# Supplementary material
Source: PubMed Central journal article supplement (PMC9156702)
Supplement: 41408_2022_684_MOESM4_ESM.pdf [file 41408_2022_684_MOESM4_ESM.pdf]

|                  | Risk of bias |    |    |    | Overall |
|------------------|--------------|----|----|----|---------|
|                  | D1           | D2 | D3 | D4 |         |
| Attolico 2021    |              |    |    |    |         |
| Avivi 2021       |              |    |    |    |         |
| Benjamini 2021   |              |    |    |    |         |
| Bergmann 2021    |              |    |    |    |         |
| Canti 2021       |              |    |    |    |         |
| Chiarucci 2021   |              |    |    |    |         |
| Fendler 2021     |              |    |    |    |         |
| Figueriedo 2021  |              |    |    |    |         |
| Marchesi 2021    |              |    |    |    |         |
| Maneikis 2021 b  |              |    |    |    |         |
| Maneikis 2021 c  |              |    |    |    |         |
| Peeters 2021 (1) |              |    |    |    |         |
| Peeters 2021 (2) |              |    |    |    |         |
| Peeters 2021 (3) |              |    |    |    |         |
| Perry 2024       |              |    |    |    |         |
| Pinana 2021      |              |    |    |    |         |
| Redjoul 2021     |              |    |    |    |         |
| Reimann 2021     |              |    |    |    |         |
| Salvini 2021     |              |    |    |    |         |
| Schiller 2021    |              |    |    |    |         |
| Soledad 2021     |              |    |    |    |         |
| Stampfer 2021    |              |    |    |    |         |
| Tadmor 2021      |              |    |    |    |         |
| Tzarfati 2021    |              |    |    |    |         |

D1: Domain 1: Participants  
D2: Domain 2: Outcome  
D3: Domain 3: Analysis  
D4: Domain 4: Selective reporting

Judgement  
 High  
 Moderate  
 Low  
 No information
