# Supplementary material
Source: PubMed Central journal article supplement (PMC9156702)
Supplement: 41408_2022_684_MOESM5_ESM.pdf [file 41408_2022_684_MOESM5_ESM.pdf]

|                     | Risk of bias |    |    |    | Overall |
|---------------------|--------------|----|----|----|---------|
|                     | D1           | D2 | D3 | D4 |         |
| Addeo 2021          | ⊖            | ⊕  | ⊖  | ⊕  | ⊖       |
| Aleman 2021         | ⊖            | ⊕  | ⊖  | ⊕  | ⊖       |
| Attolico 2021       | ⊖            | ⊕  | ⊕  | ?  | ⊖       |
| Avivi 2021          | ⊖            | ⊕  | ⊕  | ⊕  | ⊖       |
| Benjamini 2021 (1)  | ⊖            | ⊗  | ⊕  | ⊕  | ⊗       |
| Benjamini 2021 (2)  | ⊖            | ⊗  | ⊗  | ?  | ⊗       |
| Bergmann 2021       | ⊕            | ⊕  | ⊖  | ⊕  | ⊖       |
| Bitoun 2021         | ⊖            | ⊕  | ⊕  | ⊕  | ⊖       |
| Canti 2021          | ⊖            | ⊕  | ⊕  | ⊕  | ⊖       |
| Cattaneo 2021       | ⊖            | ⊗  | ⊕  | ?  | ⊗       |
| Chan 2021           | ⊖            | ⊖  | ⊕  | ⊕  | ⊖       |
| Chiarucci 2021      | ⊖            | ⊕  | ⊕  | ⊕  | ⊖       |
| Cohen 2021          | ⊕            | ⊖  | ⊕  | ⊕  | ⊖       |
| Crombie 2021        | ⊕            | ⊕  | ⊕  | ⊕  | ⊕       |
| Del Poeta 2021      | ⊕            | ⊕  | ⊕  | ⊕  | ⊕       |
| Ehmsen 2021         | ⊗            | ⊕  | ⊖  | ⊕  | ⊗       |
| Fendler 2021        | ⊕            | ⊕  | ⊗  | ⊕  | ⊗       |
| Figueriedo 2021     | ⊕            | ⊕  | ⊖  | ⊕  | ⊖       |
| Fox 2021            | ⊖            | ⊖  | ⊗  | ?  | ⊗       |
| Gavriatopoulou 2021 | ⊕            | ⊕  | ⊕  | ⊕  | ⊕       |
| Ghady 2021          | ⊖            | ⊕  | ⊕  | ?  | ⊖       |
| Ghione 2021         | ⊕            | ⊕  | ⊕  | ⊕  | ⊕       |
| Greenberger 2021    | ⊕            | ⊕  | ⊕  | ⊕  | ⊕       |
| Gurion 2021         | ⊖            | ⊕  | ⊖  | ?  | ⊖       |
| Jurgens 2021        | ⊖            | ⊕  | ⊕  | ⊕  | ⊖       |
| Kozak 2021          | ⊖            | ⊕  | ⊕  | ⊕  | ⊖       |
| Lim 2021            | ⊖            | ⊖  | ⊖  | ⊕  | ⊖       |
| Lindemann 2021      | ⊖            | ⊕  | ⊖  | ⊕  | ⊖       |
| Lockmer 2021        | ⊖            | ⊖  | ⊖  | ⊕  | ⊖       |
| Madhumita 2021      | ⊕            | ⊖  | ⊖  | ⊕  | ⊖       |
| Mairhofer 2021      | ⊖            | ⊕  | ⊕  | ⊕  | ⊖       |
| Maneikis 2021       | ⊕            | ⊕  | ⊗  | ⊕  | ⊗       |
| Marasco 2021 (1)    | ⊖            | ⊕  | ⊗  | ⊕  | ⊗       |
| Marasco 2021 (2)    | ⊖            | ⊕  | ⊕  | ⊕  | ⊖       |
| Marchesi 2021       | ⊖            | ⊕  | ⊖  | ⊕  | ⊖       |
| McKenzie 2021 (1)   | ⊕            | ⊖  | ⊕  | ⊕  | ⊖       |
| McKenzie 2021 (2)   | ⊕            | ⊕  | ⊕  | ⊕  | ⊕       |
| Molica 2021         | ⊖            | ⊕  | ⊕  | ⊕  | ⊖       |
| Mona 2021           | ⊕            | ⊕  | ⊖  | ⊕  | ⊖       |
| Perry 2021          | ⊖            | ⊕  | ⊕  | ⊕  | ⊖       |
| Pinana 2021         | ⊕            | ⊗  | ⊕  | ⊕  | ⊗       |
| Rahav 2021          | ⊕            | ⊖  | ⊕  | ⊕  | ⊖       |
| Ram 2021            | ⊖            | ⊕  | ⊕  | ⊕  | ⊖       |
| Ramasamy 2021       | ⊕            | ⊕  | ⊕  | ⊕  | ⊕       |
| Redjoul 2021        | ⊖            | ⊕  | ⊕  | ⊕  | ⊖       |
| Reimann 2021        | ⊕            | ⊕  | ⊕  | ⊕  | ⊕       |
| Salvini 2021        | ⊖            | ⊕  | ⊖  | ⊗  | ⊗       |
| Schiller 2021       | ⊕            | ⊕  | ⊖  | ⊕  | ⊖       |
| Shem-Tov 2021       | ⊕            | ⊕  | ⊕  | ?  | ⊖       |
| Shen 2021           | ⊖            | ⊕  | ⊗  | ?  | ⊗       |
| Sherman 2021        | ⊖            | ⊗  | ⊖  | ⊕  | ⊗       |
| Soledad 2021        | ⊕            | ⊕  | ⊖  | ⊕  | ⊖       |
| Stampfer 2021       | ⊖            | ⊕  | ⊕  | ⊕  | ⊖       |
| Tadmor 2021         | ⊖            | ⊖  | ⊕  | ⊕  | ⊖       |
| Tamari 2021         | ⊖            | ⊕  | ⊗  | ⊕  | ⊗       |
| Terpos 2021a        | ⊕            | ⊕  | ⊕  | ⊕  | ⊕       |
| Terpos 2021b        | ⊕            | ⊕  | ⊕  | ⊕  | ⊕       |
| Tzarfali 2021       | ⊕            | ⊕  | ⊕  | ?  | ⊖       |
| Yeshurun 2021       | ⊖            | ⊕  | ⊗  | ⊕  | ⊗       |
| Zeng 2021           | ⊖            | ⊕  | ⊕  | ⊕  | ⊖       |

D1: Domain 1: Participants  
D2: Domain 2: Outcome  
D3: Domain 3: Analysis  
D4: Domain 4: Selective reporting

Judgement  
⊗ High  
⊖ Moderate  
⊕ Low  
? No information
