# Supplementary material
Source: PubMed Central journal article supplement (PMC9156702)
Supplement: 41408_2022_684_MOESM6_ESM.pdf [file 41408_2022_684_MOESM6_ESM.pdf]

## Risk of bias

|                 | D1 | D2 | D3 | D4 | Overall |
|-----------------|----|----|----|----|---------|
| Avivi 2021      | -  | -  | +  | +  | -       |
| Benjamini 2021  | -  | -  | +  | +  | -       |
| Bergmann 2021   | +  | X  | +  | ?  | X       |
| Canti 2021      | -  | X  | +  | +  | X       |
| Cattaneo 2021   | -  | X  | +  | ?  | X       |
| Eifer 2021      | +  | -  | +  | +  | -       |
| Figueriedo 2021 | +  | X  | +  | +  | X       |
| Maneikis 2021 d | +  | X  | -  | ?  | X       |
| Molica 2021     | -  | -  | +  | +  | -       |
| Perry 2021      | -  | X  | X  | X  | X       |
| Pinana 2021     | +  | X  | +  | +  | X       |
| Rahav 2021 (1)  | +  | X  | +  | +  | X       |
| Rahav 2021 (2)  | +  | -  | +  | +  | -       |
| Ram 2021        | -  | +  | +  | +  | -       |
| Reimann 2021    | +  | -  | +  | +  | -       |
| Schiller 2021   | +  | -  | +  | ?  | -       |
| Shem-Tov 2021   | +  | -  | X  | ?  | X       |
| Sherman 2021    | -  | -  | -  | +  | -       |
| Terpos 2021 a   | +  | X  | +  | ?  | X       |
| Terpos 2021 b   | +  | X  | -  | ?  | X       |
| Yeshurun 2021   | -  | X  | -  | X  | X       |

D1: Domain 1: Participants  
D2: Domain 2: Outcome  
D3: Domain 3: Analysis  
D4: Domain 4: Selective reporting

Judgement

-  High
-  Moderate
-  Low
-  No information
