# Supplementary material
Source: PubMed Central journal article supplement (PMC9156702)

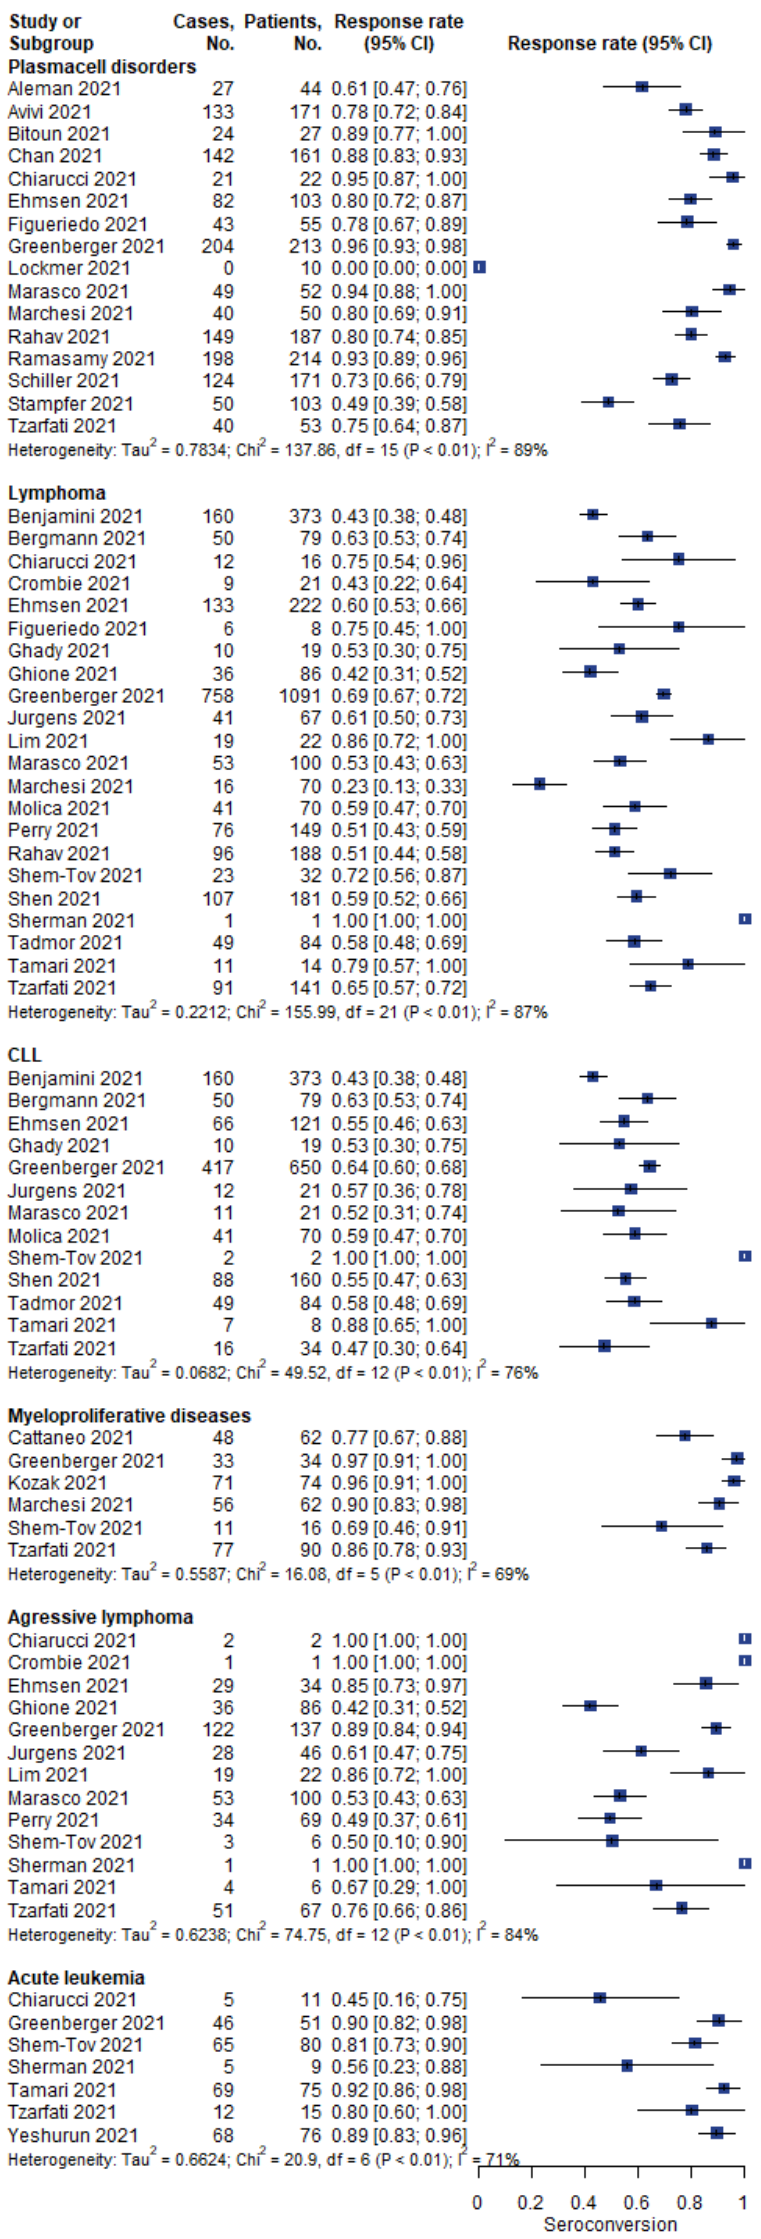

Supplement: 41408_2022_684_MOESM7_ESM.pdf [file 41408_2022_684_MOESM7_ESM.pdf]
