# Supplementary material
Source: PubMed Central journal article supplement (PMC9156702)

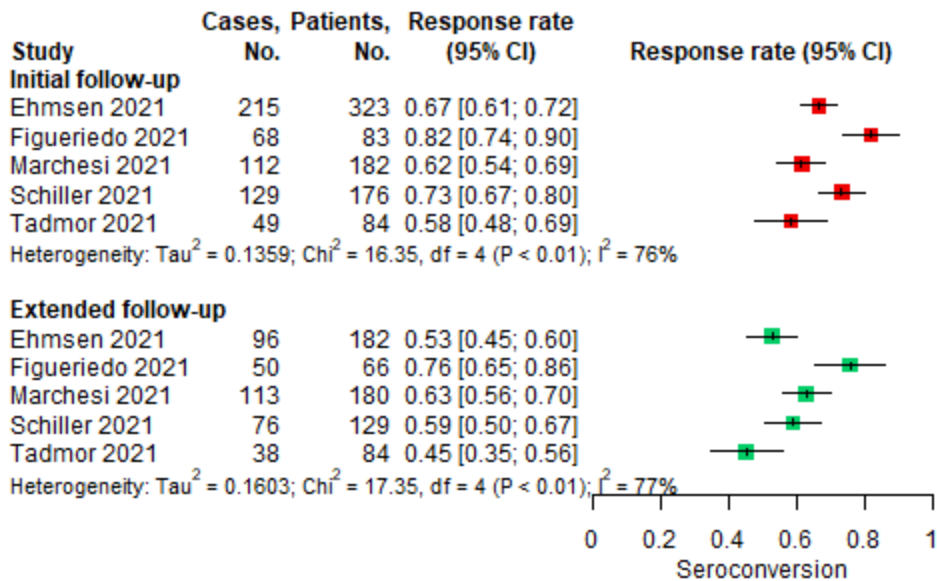

Supplement: 41408_2022_684_MOESM9_ESM.pdf [file 41408_2022_684_MOESM9_ESM.pdf]
