# Supplementary material
Source: PubMed Central journal article supplement (PMC9156702)
Supplement: 41408_2022_684_MOESM12_ESM.pdf [file 41408_2022_684_MOESM12_ESM.pdf]

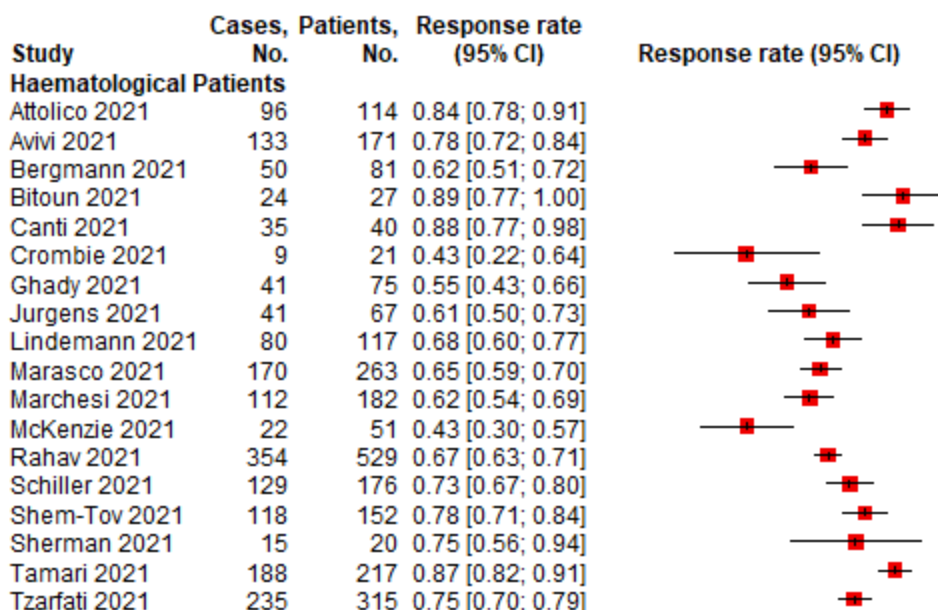

Heterogeneity:  $\text{Tau}^2 = 0.3182$ ;  $\text{Chi}^2 = 107$ ,  $\text{df} = 17$  ( $P < 0.01$ );  $I^2 = 84\%$

#### Healthy control

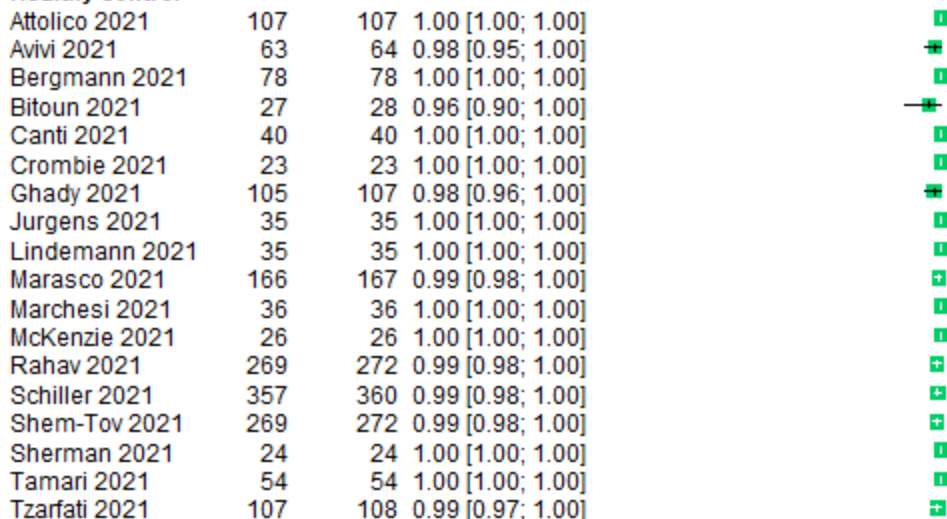

Heterogeneity:  $\text{Tau}^2 = 0$ ;  $\text{Chi}^2 = 3.78$ ,  $\text{df} = 17$  ( $P = 1.00$ );  $I^2 = 0\%$

0 0.2 0.4 0.6 0.8 1  
Seroconversion
